# Supplementary material for: Controllable digital resistive switching for artificial synapses and pavlovian learning algorithm
Source: Royal Society of Chemistry journal article supplement (doi:10.1039/c9nr02027f), 2019-01-01
Supplement: c9nr02027f1.pdf [file c9nr02027f1.pdf]

## Supplementary information

### Controllable Digital Resistive Switching for Artificial Synapses and Pavlovian Learning Algorithm

Mohit Kumar,<sup>a,b</sup> Sohail Abbas,<sup>a,b</sup> Jung-Ho Lee,<sup>c,\*</sup> and Joondong Kim<sup>a,b,\*</sup>

<sup>a</sup>Photoelectric and Energy Device Application Lab (PEDAL), Multidisciplinary Core Institute for Future Energies (MCIFE), Incheon, 22012, Republic of Korea

<sup>b</sup>Department of Electrical Engineering, Incheon National University, 119 Academy Rd. Yeonsu, Incheon, 22012, Republic of Korea

<sup>c</sup>Department of Materials and Chemical Engineering, Hanyang University, Ansan, Kyunggido, 15588, Korea

\* Corresponding author e-mail: J. Kim (joonkim@incheon.ac.kr) and J.-H. Lee (jungho@hanyang.ac.kr)

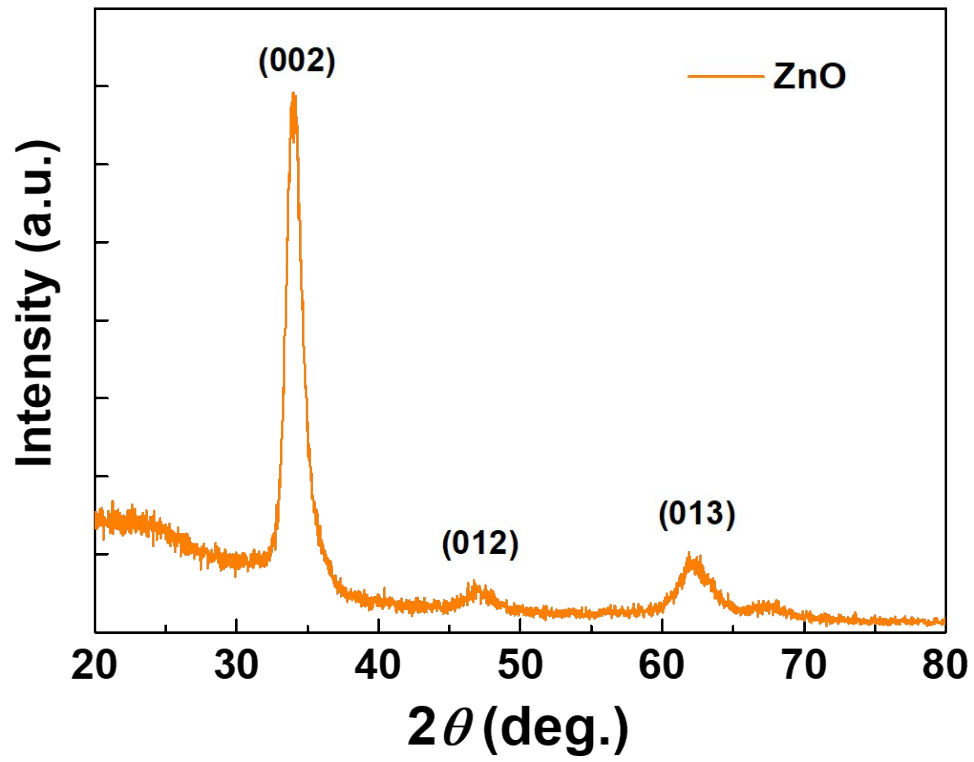

**Fig S1.** XRD spectra of the ZnO thin film; the presence of the intense peak close to 34 degrees corresponds to the (002) plane of the ZnO crystal.

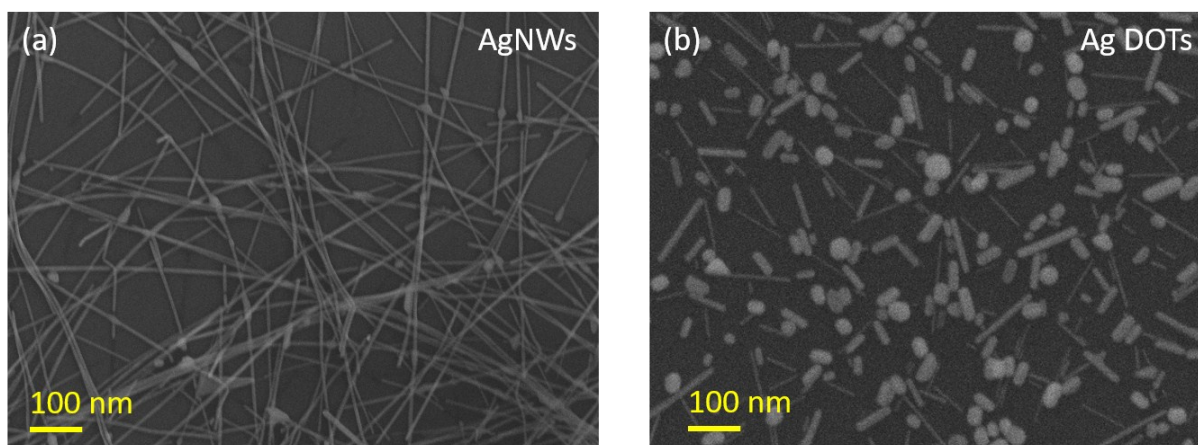

Fig. S2: The SEM image of (a) AgNWs and (b) Ag dots coated Si substrates. These two substrates were used to grow the ZnO and ITO films sequentially.

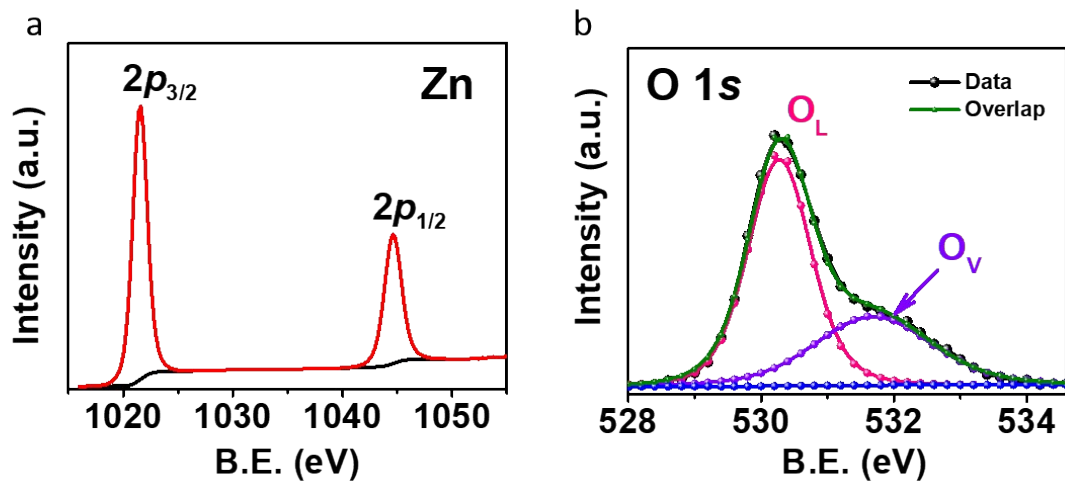

**Fig S3.** a) and b) depict the Zn 2p and O 1s XPS spectra, respectively, obtained from the ZnO thin film.

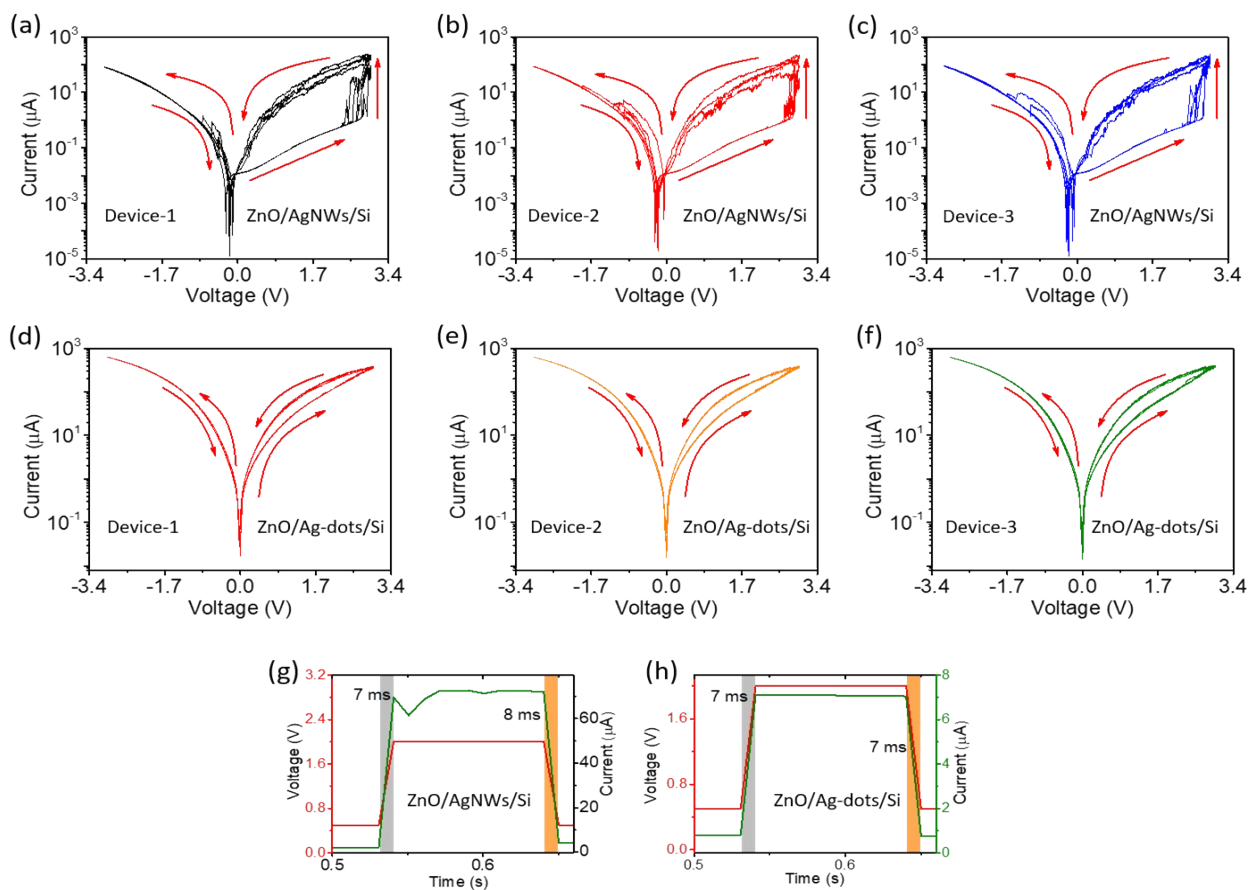

Fig. S4: Typical  $I-V$  curves for (a-c) ITO/ZnO/AgNWs/Si and (d-f) ITO/ZnO/Ag-dots/Si devices in semilogarithmic scale. (g) ITO/ZnO/AgNWs/Si device response with applied pulse. (h) ITO/ZnO/Ag-dots/Si devices response with applied pulse.

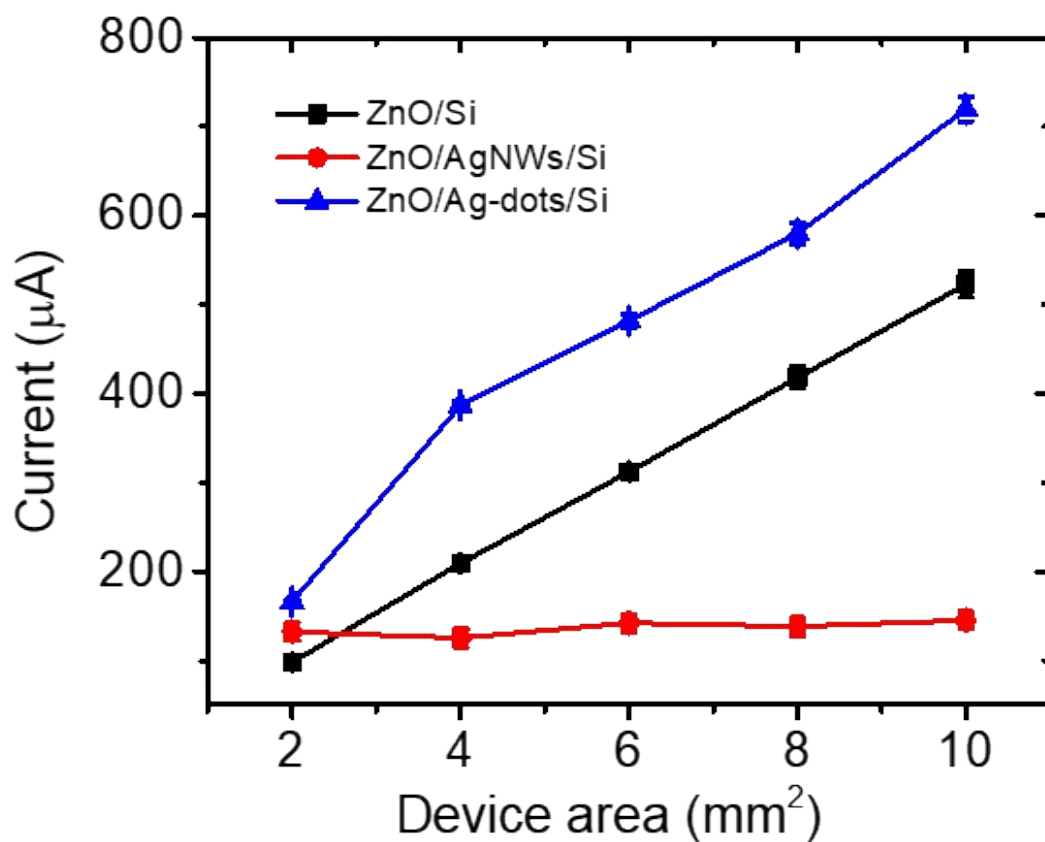

**Fig S5.** Current profile versus area of the devices. Note that the current increases with increasing device area for the ZnO/Si and ZnO/Ag-dots/Si devices. However, the current remains the same for the ZnO/AgNWs/Si devices.

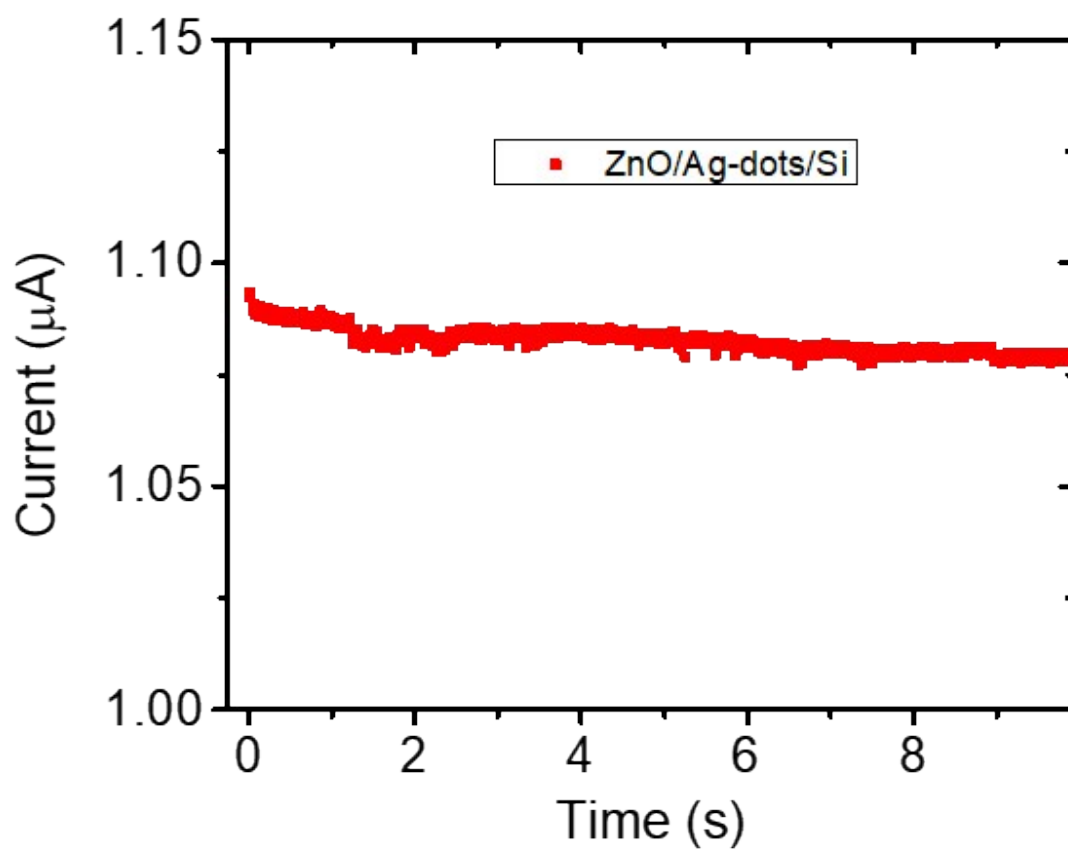

**Fig S6.** The change decay with time measured at +0.5V; this decaying behavior corresponds to the STM behavior of the device.

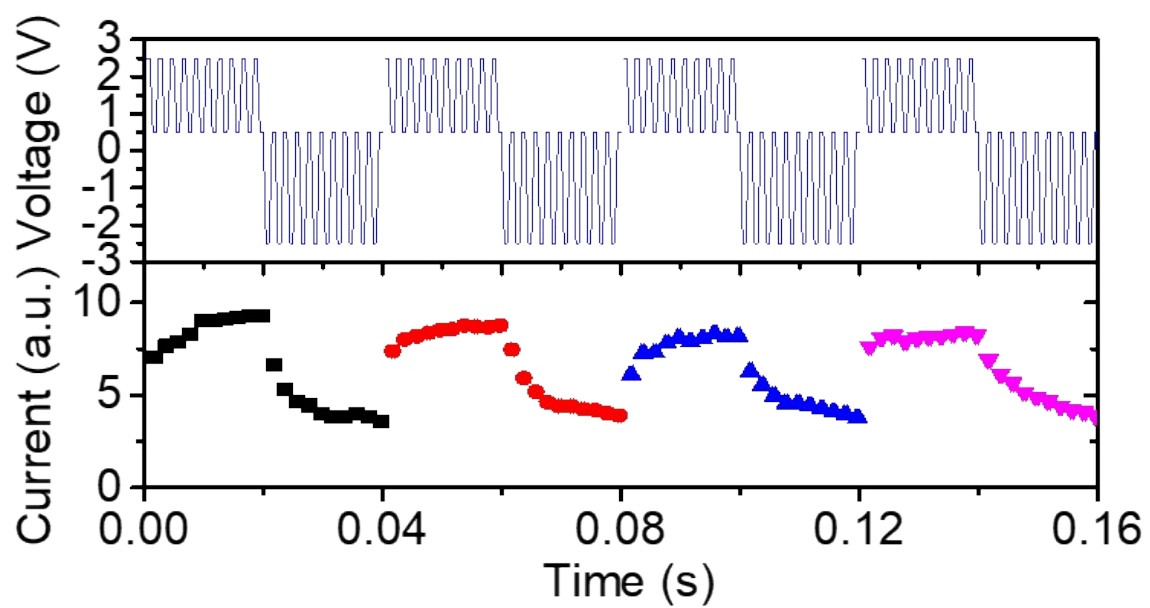

**Fig S7.** Reproducibility of the device for demonstration of potentiation.
